# Supplementary material for: A Modified Sequential Deposition Route for High-Performance Carbon-Based Perovskite Solar Cells under Atmosphere Condition
Source: MDPI journal article supplement (doi:10.3390/molecules27020481), 2022-01-13
Supplement: s1 [file s1]

# **A modified sequential deposition route for high-performance carbon-based perovskite solar cells under atmosphere condition**

**Jinyu Wu<sup>1</sup> , Lei Zhang<sup>1,2</sup>, Qiao Kang<sup>1</sup>, Hongxi Shi<sup>1</sup>, Long Li<sup>1</sup>, Dan Chi<sup>1,\*</sup>, Shihua Huang<sup>1,\*</sup>, Gang He<sup>2,\*</sup>**

<sup>1</sup> Provincial Key Laboratory of Solid State Optoelectronic Devices, Zhejiang Normal University, 321004, China;chidan@zjnu.edu.cn, huangshihua@zjnu.cn

<sup>2</sup> Faculty of Materials Science and Chemistry, China University of Geosciences, Wuhan, 430074, China.  
Email: gh6321@cug.edu.cn

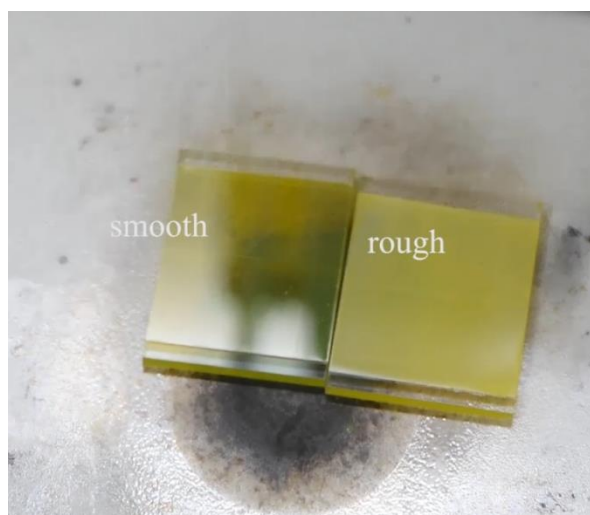

**Figure S1. Photograph of PbI<sub>2</sub> films with (left) and without DMSO (right)**

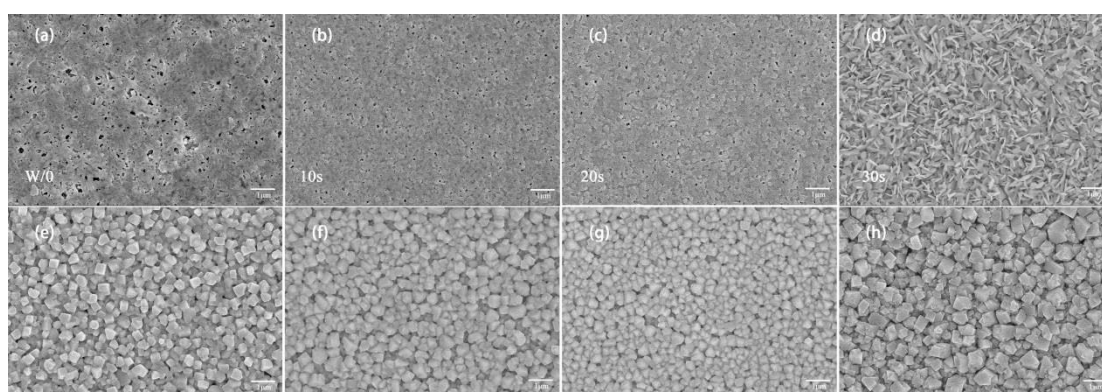

**Figure S2. SEM top view images of PbI<sub>2</sub> films prepared under different exposure time from (b)–(f) 10s to 30s, and corresponding MAPbI<sub>3</sub> films (f)–(h), respectively.**

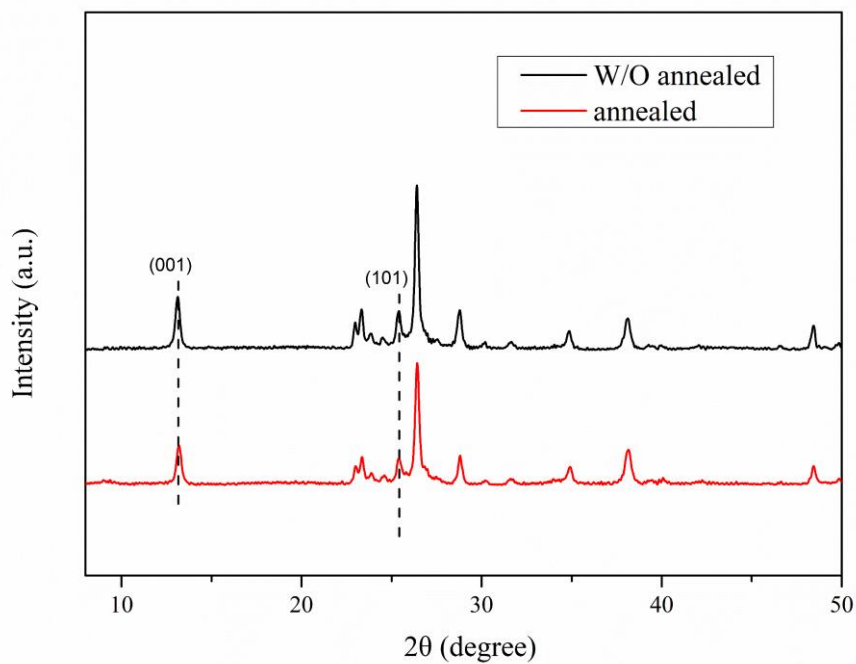

Figure S3. XRD patterns of corresponding MAPbI<sub>3</sub> films without (black line) and with annealing (red line).

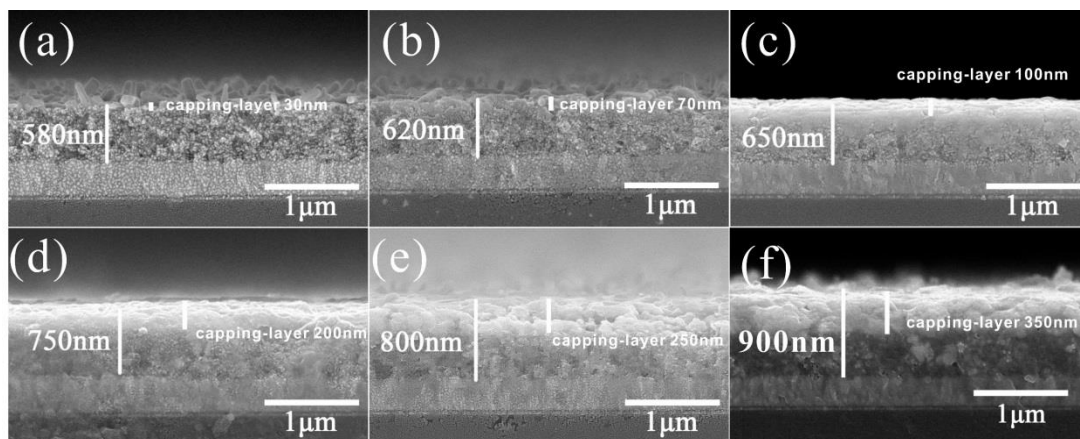

Figure S4. Cross-sectional SEM images of PbI<sub>2</sub> films prepared under different spin-coating speeds from (a)–(f) 6000 r.p.m. to 1000 r.p.m..

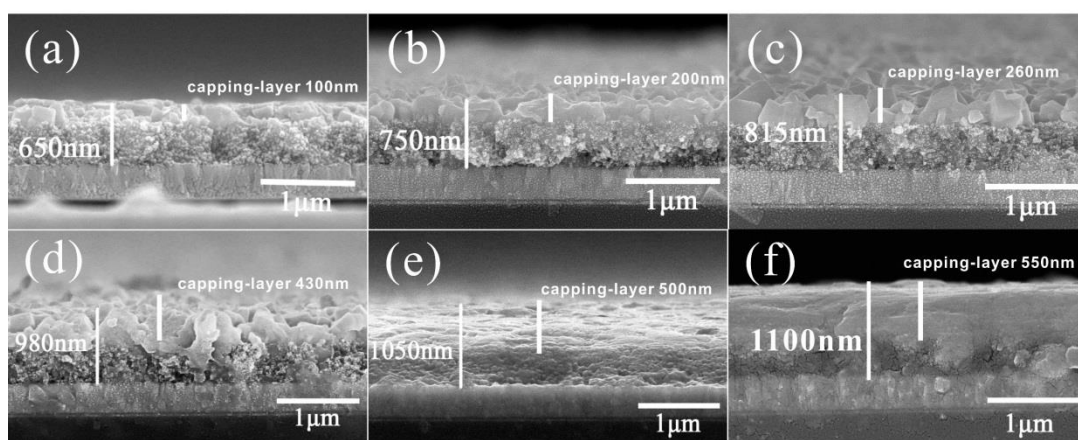

**Figure S5.** Cross-sectional SEM images of MAPbI<sub>3</sub> films corresponding PbI<sub>2</sub> films prepared under different spin-coating speeds from (a)–(f) 6000 r.p.m. to 1000 r.p.m..
